# Supplementary material for: Highly flexible and degradable memory electronics comprised of all-biocompatible materials
Source: Royal Society of Chemistry journal article supplement (doi:10.1039/d0nr05858k), 2020-12-10
Supplement: d0nr05858k1.pdf [file d0nr05858k1.pdf]

Electronic Supplementary Material (ESI) for Nanoscale.  
This journal is © The Royal Society of Chemistry 2017

---

## Supporting information

### Highly Flexible and Degradable Memory Electronics Comprised of All-Biocompatible Materials

Tongfen Jiang<sup>a</sup>, Xianghao Meng<sup>a</sup>, Zhe Zhou<sup>a</sup>, Yueyue Wu<sup>a</sup>, Zhihui Tian<sup>a</sup>, Zhengdong Liu<sup>\*a</sup>, Gang Lu<sup>a</sup>,  
Mustafa Eginlidil<sup>a</sup>, Hai-Dong Yu<sup>\*a</sup>, Juqing Liu<sup>\*a</sup>, and Wei Huang<sup>a,b</sup>

<sup>a</sup> Key Laboratory of Flexible Electronics (KLOFE) & Institute of Advanced Materials  
(IAM), Nanjing Tech University (NanjingTech), 30 South Puzhu Road, Nanjing 211816,  
China.

E-mail: iamzdliu@njtech.edu.cn; iamhdyu@njtech.edu.cn; iamjqliu@njtech.edu.cn.

<sup>b</sup> Frontiers Science Center for Flexible Electronics (FSCFE), Shaanxi Institute of Flexible  
Electronics (SIFE) & Shaanxi Institute of Biomedical Materials and Engineering (SIBME),  
Northwestern Polytechnical University (NPU), 127 West Youyi Road, Xi'an 710072,  
China.

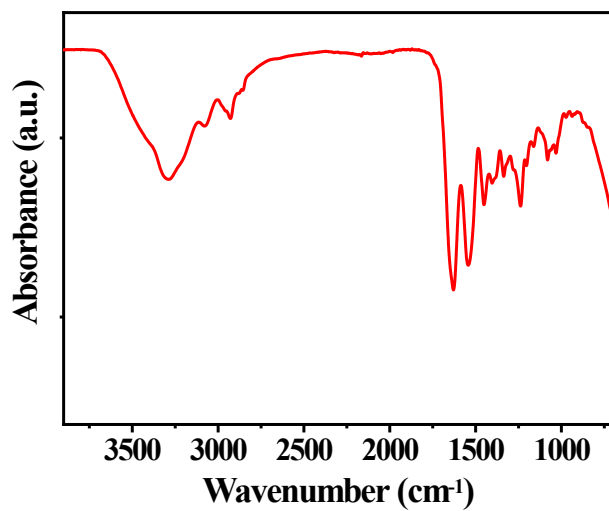

**Figure S1.** FTIR spectrum of the gelatin film.

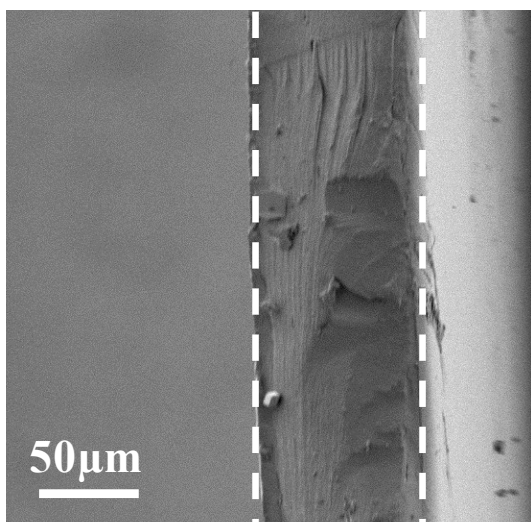

**Figure S2.** The Cross-sectional scanning electron microscopy (SEM) image of gelatin substrate.

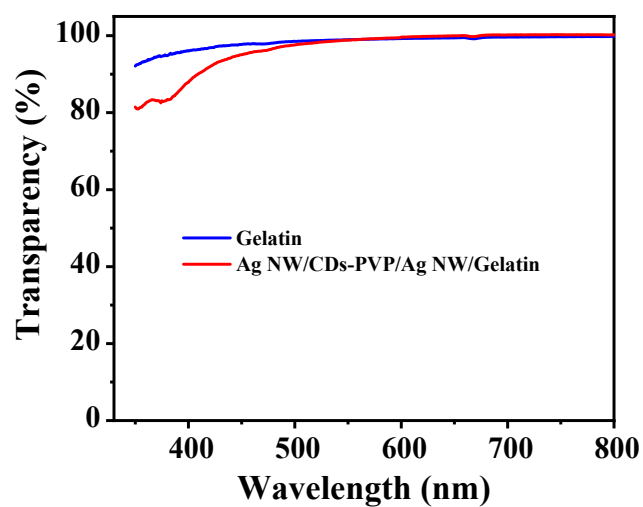

**Figure S3.** Optical transmittance of pure gelatin substrate and Ag NW/CDs-PVP/Ag NW/Gelatin film.

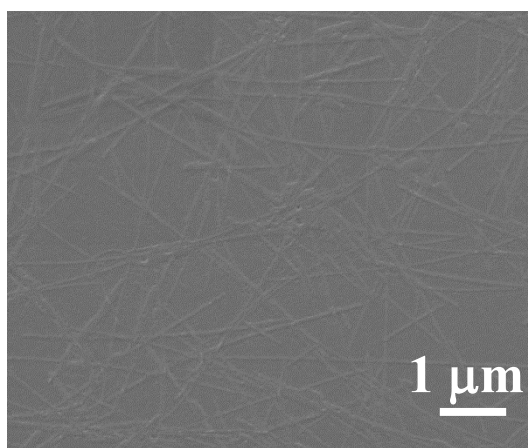

**Figure S4.** SEM micrograph of Ag NW-gelatin electrode.

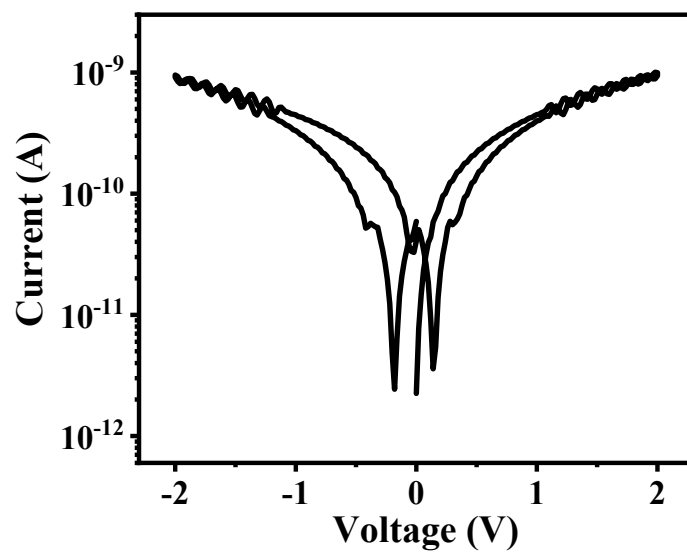

**Figure S5.** Current versus voltage (*I-V*) curve of memory with an architecture of Ag NW/PVP/Ag NW/Gelatin.

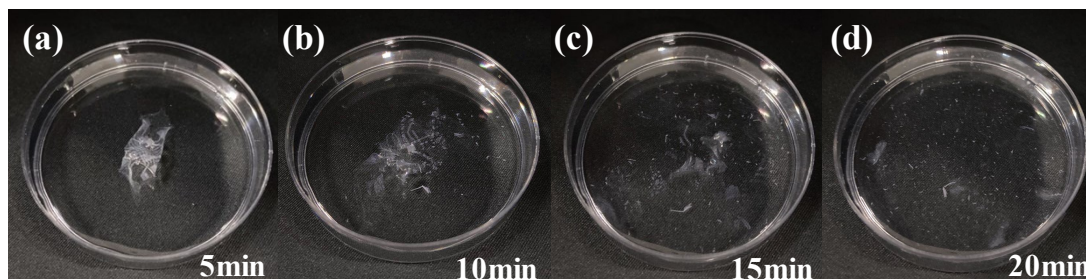

**Figure S6.** Dissolution process of the memory device in deionized water at room temperature.
